# Supplementary material
Source: PubMed Central journal article supplement (PMC490006)

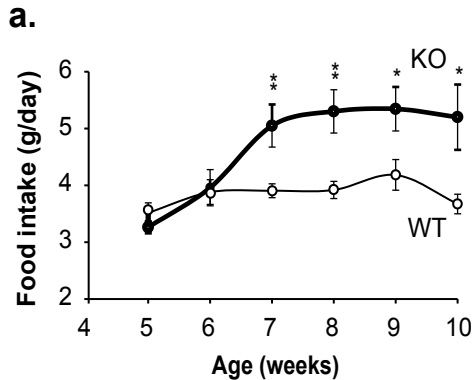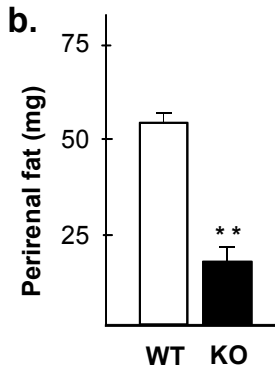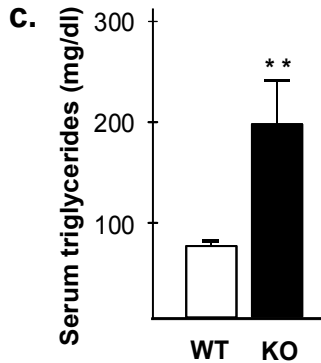

Supplement: pnas_101_29_10750__1.pdf [file pnas_101_29_10750__1.pdf]
